# Supplementary material for: Comparison of the Transcriptional Profiles of Melanocytes from Dark and Light Skinned Individuals under Basal Conditions and Following Ultraviolet-B Irradiation
Source: PubMed Central journal article supplement (PMC4526690; doi:10.1371/journal.pone.0134911), 2015-08-05
Supplement: pone.0134911.s001.pdf [file pone.0134911.s001.pdf]

**S1 Table.** Top 50 upregulated genes in LM vs DM 12 hours after UVB (non- coding RNAs are indicated with \*) (bonferroni-adjusted p-value <0.0001).

| Locus name            | Accession number | Description                                                                                         |
|-----------------------|------------------|-----------------------------------------------------------------------------------------------------|
| <i>RPLP2</i>          | NM_001004        | <i>Homo sapiens</i> ribosomal protein, large, P2                                                    |
| <i>ACTB</i>           | NM_001101        | <i>Homo sapiens</i> actin, beta                                                                     |
| <i>RPS28</i>          | NM_001031        | <i>Homo sapiens</i> ribosomal protein S28                                                           |
| <i>FTH1</i>           | NM_002032        | <i>Homo sapiens</i> ferritin, heavy polypeptide 1                                                   |
| <i>STK39</i>          | NM_013233        | <i>Homo sapiens</i> serine threonine kinase 39                                                      |
| <i>FUT8</i>           | NM_178155        | <i>Homo sapiens</i> fucosyltransferase 8 (alpha (1,6) fucosyltransferase)                           |
| <i>ENOX2</i>          | NM_182314        | <i>Homo sapiens</i> ecto-NOX disulfide-thiol exchanger 2                                            |
| * <i>LOC100128054</i> | NR_033969        |                                                                                                     |
| <i>WDR7</i>           | NM_015285        | <i>Homo sapiens</i> WD repeat domain 7                                                              |
| <i>RNGTT</i>          | NM_003800        | <i>Homo sapiens</i> RNA guanylyltransferase and 5'-phosphatase                                      |
| <i>LMO7</i>           | NM_005358        | <i>Homo sapiens</i> LIM domain 7                                                                    |
| <i>CDKN3</i>          | NM_005192        | <i>Homo sapiens</i> cyclin-dependent kinase inhibitor 3                                             |
| <i>SCLT1</i>          | NM_144643        | <i>Homo sapiens</i> sodium channel and clathrin linker 1                                            |
| <i>PPM1H</i>          | NM_020700        | <i>Homo sapiens</i> protein phosphatase, Mg <sup>2+</sup> /Mn <sup>2+</sup> dependent, 1H           |
| <i>TMEM117</i>        | NM_032256        | <i>Homo sapiens</i> transmembrane protein 117                                                       |
| <i>TBC1D19</i>        | NM_018317        | <i>Homo sapiens</i> TBC1 domain family, member 19                                                   |
| <i>DNAJC1</i>         | NM_022365        | <i>Homo sapiens</i> DnaJ (Hsp40) homolog, subfamily C, member 1                                     |
| <i>NEURL1B</i>        | NM_001142651     | <i>Homo sapiens</i> neuralized homolog 1B ( <i>Drosophila</i> )                                     |
| <i>CCNB1</i>          | NM_031966        | <i>Homo sapiens</i> cyclin B1                                                                       |
| <i>CDKL2</i>          | NM_003948        | <i>Homo sapiens</i> cyclin-dependent kinase-like 2 (CDC2-related kinase)                            |
| <i>ATP6V0A4</i>       | NM_020632        | <i>Homo sapiens</i> ATPase, H <sup>+</sup> transporting, lysosomal V0 subunit a4                    |
| <i>EFCAB11</i>        | NM_145231        | <i>Homo sapiens</i> EF-hand calcium binding domain 11                                               |
| <i>CCDC91</i>         | NM_018318        | <i>Homo sapiens</i> coiled-coil domain containing 91                                                |
| <i>CWC27</i>          | NM_005869        | <i>Homo sapiens</i> CWC27 spliceosome-associated protein homolog ( <i>S. cerevisiae</i> )           |
| <i>PKP4</i>           | NM_003628        | <i>Homo sapiens</i> plakophilin 4                                                                   |
| <i>ANK3</i>           | NM_020987        | <i>Homo sapiens</i> ankyrin 3, node of Ranvier (ankyrin G)                                          |
| <i>FTH1</i>           | NM_002032        | <i>Homo sapiens</i> ferritin, heavy polypeptide 1                                                   |
| <i>SCD5</i>           | NM_001037582     | <i>Homo sapiens</i> stearoyl-CoA desaturase 5                                                       |
| <i>ABAT</i>           | NM_000663        | <i>Homo sapiens</i> 4-aminobutyrate aminotransferase                                                |
| <i>DEPDC1B</i>        | NM_018369        | <i>Homo sapiens</i> DEP domain containing 1B                                                        |
| <i>SLC24A1</i>        | NM_004727        | <i>Homo sapiens</i> solute carrier family 24 sodium/potassium/calcium exchanger)                    |
| <i>CADM3</i>          | NM_021189        | <i>Homo sapiens</i> cell adhesion molecule 3                                                        |
| <i>FIG4</i>           | NM_014845        | <i>Homo sapiens</i> FIG4 homolog, SAC1 lipid phosphatase domain containing ( <i>S. cerevisiae</i> ) |
| <i>EPB41L4A</i>       | NM_022140        | <i>Homo sapiens</i> erythrocyte membrane protein band 4.1 like 4A                                   |
| <i>HMGN2</i>          | NM_005517        | <i>Homo sapiens</i> high mobility group nucleosomal binding domain 2                                |
| <i>EXOC6</i>          | NM_019053        | <i>Homo sapiens</i> exocyst complex component 6                                                     |
| <i>GHR</i>            | NM_000163        | <i>Homo sapiens</i> growth hormone receptor                                                         |
| <i>DZIP3</i>          | NM_014648        | <i>Homo sapiens</i> DAZ interacting protein 3, zinc finger                                          |
| <i>MYO9A</i>          | NM_006901        | <i>Homo sapiens</i> myosin IXA                                                                      |
| <i>COG5</i>           | NM_006348        | <i>Homo sapiens</i> component of oligomeric golgi complex 5                                         |
| <i>HMGN2</i>          | NM_005517        | <i>Homo sapiens</i> high mobility group nucleosomal binding domain 2                                |
| <i>LMBRD1</i>         | NM_018368        | <i>Homo sapiens</i> LMBR1 domain containing 1                                                       |
| <i>PMEL (SILV)</i>    | NM_006928        | <i>Homo sapiens</i> premelanosome protein ( <i>Homo sapiens</i> silver homolog (mouse))             |
| <i>FRMD5</i>          | NM_032892        | FERM domain containing 5                                                                            |
| <i>CENPA</i>          | NM_001809        | <i>Homo sapiens</i> centromere protein A                                                            |
| <i>CDKN2A</i>         | NM_058197        | <i>Homo sapiens</i> cyclin-dependent kinase inhibitor 2A (melanoma, p16, inhibits CDK4)             |
| <i>RDM1</i>           | NM_001034836     | <i>Homo sapiens</i> RAD52 motif 1                                                                   |
| <i>QPCT</i>           | NM_012413        | <i>Homo sapiens</i> glutaminyl-peptide cyclotransferase                                             |
| <i>GNAQ</i>           | NM_002072        | <i>Homo sapiens</i> guanine nucleotide binding protein (G protein), q polypeptide                   |
| <i>ARHGAP32</i>       | NM_014715        | <i>Homo sapiens</i> Rho GTPase activating protein 32                                                |
