# Supplementary material for: Comparison of the Transcriptional Profiles of Melanocytes from Dark and Light Skinned Individuals under Basal Conditions and Following Ultraviolet-B Irradiation
Source: PubMed Central journal article supplement (PMC4526690; doi:10.1371/journal.pone.0134911), 2015-08-05
Supplement: pone.0134911.s002.pdf [file pone.0134911.s002.pdf]

**S2 Table.** Top 50 upregulated genes in DM vs LM 12 hours after UVB (non- coding RNAs are indicated with \*) (bonferroni-adjusted p-value <0.0001).

| Locus name            | Accession number | Description                                                                        |
|-----------------------|------------------|------------------------------------------------------------------------------------|
| <i>KPNB1</i>          | NM_002265        | <i>Homo sapiens</i> karyopherin (importin) beta 1                                  |
| <i>NUP50</i>          | NM_007172        | <i>Homo sapiens</i> nucleoporin 50kDa                                              |
| <i>GABPB1</i>         | NM_002041        | <i>Homo sapiens</i> GA binding protein transcription factor, beta subunit 1        |
| <i>CACHD1</i>         | NM_020925        | <i>Homo sapiens</i> cache domain containing 1                                      |
| <i>NOM1</i>           | NM_138400        | <i>Homo sapiens</i> nucleolar protein with MIF4G domain 1                          |
| <i>LRRC42</i>         | NM_029985        | Leucine rich repeat containing 42                                                  |
| <i>GET4</i>           | NM_015949        | <i>Homo sapiens</i> golgi to ER traffic protein 4 homolog ( <i>S. cerevisiae</i> ) |
| <i>C16orf55</i>       | NM_153025        | <i>Homo sapiens</i> chromosome 16 open reading frame 55                            |
| <i>MRPL15</i>         | NM_014175        | <i>Homo sapiens</i> mitochondrial ribosomal protein L15                            |
| <i>MT1X</i>           | NM_005952        | <i>Homo sapiens</i> metallothionein 1X                                             |
| * <i>LOC399744</i>    | NR_024497        |                                                                                    |
| <i>CPSF3L</i>         | NM_017871        | <i>Homo sapiens</i> cleavage and polyadenylation specific factor 3-like            |
| <i>ZNF498</i>         | NM_145115        | <i>Homo sapiens</i> zinc finger protein 498                                        |
| * <i>LOC151174</i>    | NR_026925        |                                                                                    |
| <i>UPF3A</i>          | NM_023011        | <i>Homo sapiens</i> UPF3 regulator of nonsense transcripts homolog A               |
| <i>SSR3</i>           | NM_007107        | <i>Homo sapiens</i> signal sequence receptor, gamma                                |
| <i>DAB1</i>           | NM_021080        | <i>Homo sapiens</i> disabled homolog 1 ( <i>Drosophila</i> )                       |
| <i>HOOK3</i>          | NM_032410        | <i>Homo sapiens</i> hook homolog 3 ( <i>Drosophila</i> )                           |
| <i>MFSF8</i>          | NM_152778        | <i>Homo sapiens</i> major facilitator superfamily domain containing 8              |
| <i>CHRD</i>           | NM_003741        | <i>Homo sapiens</i> chordin                                                        |
| * <i>LOC100129280</i> | AK126613         |                                                                                    |
| <i>MAD2L2</i>         | NM_027985        | MAD2 mitotic arrest deficient-like 2 (yeast)                                       |
| <i>GCN1L1</i>         | NM_006836        | <i>Homo sapiens</i> GCN1 general control of amino-acid synthesis 1-like 1 (yeast)  |
| <i>HMX2</i>           | NM_005519        | <i>Homo sapiens</i> H6 family homeobox 2                                           |
| <i>AAMP</i>           | NM_001087        | <i>Homo sapiens</i> angio-associated, migratory cell protein                       |
| <i>ANKRD30B</i>       | NM_001145029     | <i>Homo sapiens</i> ankyrin repeat domain 30B                                      |
| <i>AVIL</i>           | NM_006576        | <i>Homo sapiens</i> advillin                                                       |
| <i>STAG2</i>          | NM_001042749     | <i>Homo sapiens</i> stromal antigen 2                                              |
| <i>GBA2</i>           | NM_020944        | <i>Homo sapiens</i> glucosidase, beta (bile acid) 2                                |
| <i>MAP2K4</i>         | NM_003010        | <i>Homo sapiens</i> mitogen-activated protein kinase kinase 4                      |
| <i>SDF2</i>           | NM_006923        | <i>Homo sapiens</i> stromal cell-derived factor 2                                  |
| <i>CPT1B</i>          | NM_152246        | <i>Homo sapiens</i> carnitine palmitoyltransferase 1B (muscle)                     |
| <i>SH3D21</i>         | NM_001162530     | <i>Homo sapiens</i> SH3 domain containing 21                                       |
| <i>C10orf96</i>       | NM_198515        | <i>Homo sapiens</i> chromosome 10 open reading frame 96                            |
| <i>STARD3</i>         | NM_001165937     | <i>Homo sapiens</i> StAR-related lipid transfer (START) domain containing 3        |
| * <i>LOC339807</i>    | NR_034023        |                                                                                    |
| <i>B3GALNT2</i>       | NM_152490        | <i>Homo sapiens</i> beta-1,3-N-acetylgalactosaminyltransferase 2                   |
| <i>SRM</i>            | NM_003132        | <i>Homo sapiens</i> spermidine synthase                                            |
| <i>ZNF562</i>         | NM_017656        | <i>Homo sapiens</i> zinc finger protein 562                                        |
| <i>CCT8</i>           | NM_006585        | <i>Homo sapiens</i> chaperonin containing TCP1, subunit 8 (theta)                  |
| <i>MPDU1</i>          | NM_004870        | <i>Homo sapiens</i> mannose-P-dolichol utilization defect 1                        |
| <i>POLR3A</i>         | NM_007055        | <i>Homo sapiens</i> polymerase (RNA) III                                           |
| <i>ENY2</i>           | NM_020189        | <i>Homo sapiens</i> enhancer of yellow 2 homolog ( <i>Drosophila</i> )             |
| <i>C3orf19</i>        | NM_016474        | <i>Homo sapiens</i> chromosome 3 open reading frame 19                             |
| <i>MRPS18A</i>        | NM_018135        | <i>Homo sapiens</i> mitochondrial ribosomal protein S18A                           |
| <i>DENND3</i>         | NM_014957        | DENN/MADD domain containing 3                                                      |
| <i>F11R</i>           | NM_016946        | <i>Homo sapiens</i> F11 receptor                                                   |
| <i>HERC5</i>          | NM_016323        | <i>Homo sapiens</i> hect domain and RLD 5                                          |
| <i>ADM2</i>           | NM_024866        | <i>Homo sapiens</i> adrenomedullin 2                                               |
| <i>ASXL2</i>          | NM_018263        | <i>Homo sapiens</i> additional sex combs like 2 ( <i>Drosophila</i> )              |
