# Supplementary material for: Comparison of the Transcriptional Profiles of Melanocytes from Dark and Light Skinned Individuals under Basal Conditions and Following Ultraviolet-B Irradiation
Source: PubMed Central journal article supplement (PMC4526690; doi:10.1371/journal.pone.0134911), 2015-08-05
Supplement: pone.0134911.s003.pdf [file pone.0134911.s003.pdf]

**S3 Table.** Top 50 upregulated genes in LM vs DM 24 hours after UVB (non- coding RNAs are indicated with \*) (bonferroni-adjusted p-value <0.0001).

| Locus name            | Accession number             | Description                                                                               |
|-----------------------|------------------------------|-------------------------------------------------------------------------------------------|
| <i>PRKG1</i>          | NM_006258                    | <i>Homo sapiens</i> protein kinase, cGMP-dependent, type I                                |
| <i>ALPL</i>           | NM_000478                    | <i>Homo sapiens</i> alkaline phosphatase, liver/bone/kidney                               |
| <i>BCAM</i>           | NM_001013257                 | <i>Homo sapiens</i> basal cell adhesion molecule (Lutheran blood group)                   |
| <i>DEFB121</i>        | NM_001171832                 | <i>Homo sapiens</i> defensin, beta 121                                                    |
| * <i>HCG9</i>         | NR_028032                    | <i>Homo sapiens</i> HLA complex group 9                                                   |
| <i>C11orf66</i>       | NM_145017                    | <i>Homo sapiens</i> chromosome 11 open reading frame 66                                   |
| <i>FLJ36848</i>       | AK094167                     | <i>Homo sapiens</i> cDNA FLJ36848 fis, clone ASTRO2013802.                                |
| <i>CCDC85A</i>        | NM_001080433                 | <i>Homo sapiens</i> coiled-coil domain containing 85A                                     |
| <i>NR4A1</i>          | NM_002135                    | <i>Homo sapiens</i> nuclear receptor subfamily 4, group A, member 1                       |
| * <i>DKFZP434K028</i> | NR_026882                    | <i>Homo sapiens</i> hypothetical LOC26070                                                 |
| <i>GREM1</i>          | NM_013372                    | <i>Homo sapiens</i> gremlin 1                                                             |
| <i>ELTD1</i>          | NM_022159                    | <i>Homo sapiens</i> EGF, latrophilin and seven transmembrane domain containing 1          |
| <i>PLCB1</i>          | NM_015192                    | <i>Homo sapiens</i> phospholipase C, beta 1                                               |
| <i>NPTX2</i>          | NM_002523                    | <i>Homo sapiens</i> neuronal pentraxin II                                                 |
| <i>ASPN</i>           | NM_001193335                 | <i>Homo sapiens</i> asporin                                                               |
| <i>COX8C</i>          | NM_182971                    | <i>Homo sapiens</i> cytochrome c oxidase subunit VIIIc                                    |
| <i>C12orf42</i>       | Source:HGNC Symbol;Acc:24729 | chromosome 12 open reading frame 42                                                       |
| <i>AMZ1</i>           | NM_133463                    | <i>Homo sapiens</i> archaelysin family metalloproteinase 1                                |
| * <i>LOC441495</i>    | NR_033773                    | <i>Homo sapiens</i> centromere protein V pseudogene                                       |
| <i>LHX2</i>           | NM_004789                    | <i>Homo sapiens</i> LIM homeobox 2                                                        |
| <i>SLC22A12</i>       | NM_144585                    | <i>Homo sapiens</i> solute carrier family 22 (organic anion/urate transporter), member 12 |
| <i>ARID3C</i>         | NM_001017363                 | <i>Homo sapiens</i> AT rich interactive domain 3C BRIGHT-like                             |
| <i>DCDC1</i>          | NM_181807                    | <i>Homo sapiens</i> doublecortin domain containing 1                                      |
| <i>IL22RA1</i>        | NM_021258                    | <i>Homo sapiens</i> interleukin 22 receptor, alpha 1                                      |
| * <i>SNAR-B1</i>      | BF570972                     |                                                                                           |
| <i>SLA</i>            | NM_001045556                 | <i>Homo sapiens</i> Src-like-adaptor                                                      |
| * <i>TPRXL</i>        | NR_002223                    | <i>Homo sapiens</i> tetra-peptide repeat homeobox-like                                    |
| <i>C9orf152</i>       | NM_001012993                 | <i>Homo sapiens</i> chromosome 9 open reading frame 152                                   |
| * <i>XLOC_002736</i>  |                              |                                                                                           |
| <i>LTBP1</i>          | NM_206943                    | <i>Homo sapiens</i> latent transforming growth factor beta binding protein 1              |
| <i>CYP2W1</i>         | NM_017781                    | <i>Homo sapiens</i> cytochrome P450, family 2, subfamily W, polypeptide 1                 |
| <i>CXADR</i>          | NM_001338                    | <i>Homo sapiens</i> coxsackie virus and adenovirus receptor                               |
| <i>LRRTM2</i>         | NM_015564                    | <i>Homo sapiens</i> leucine rich repeat transmembrane neuronal 2                          |
| <i>GRM2</i>           | NM_000839                    | <i>Homo sapiens</i> glutamate receptor, metabotropic 2                                    |
| <i>PCSK1</i>          | NM_000439                    | <i>Homo sapiens</i> proprotein convertase subtilisin/kexin type 1                         |
| * <i>NCRNA00242</i>   | NR_026781                    | <i>Homo sapiens</i> non-protein coding RNA 242                                            |
| <i>ZNF711</i>         | NM_021998                    | <i>Homo sapiens</i> zinc finger protein 711                                               |
| <i>COX3</i>           | NC_012920.1                  | mitochondrially encoded cytochrome c oxidase III                                          |
| <i>POTEF</i>          | NM_001099771                 | <i>Homo sapiens</i> POTE ankyrin domain family, member F                                  |
| <i>RPL22L1</i>        | NM_001099645                 | <i>Homo sapiens</i> ribosomal protein L22-like 1                                          |
| <i>AGMO</i>           | NM_001004320                 | <i>Homo sapiens</i> alkylglycerol monooxygenase                                           |
| <i>COL4A2</i>         | NM_001846                    | <i>Homo sapiens</i> collagen, type IV, alpha 2                                            |
| <i>FOXD1</i>          | NM_004472                    | <i>Homo sapiens</i> forkhead box D1                                                       |
| <i>FUT6</i>           | NM_000150                    | <i>Homo sapiens</i> fucosyltransferase 6 (alpha (1,3) fucosyltransferase)                 |
| <i>MAL</i>            | NM_002371                    | <i>Homo sapiens</i> mal, T-cell differentiation protein                                   |
| <i>SMS</i>            | NM_004595                    | <i>Homo sapiens</i> spermine synthase                                                     |
| <i>HSPA8</i>          | NM_153201                    | <i>Homo sapiens</i> heat shock 70kDa protein 8                                            |
| <i>PYGL</i>           | NM_002863                    | <i>Homo sapiens</i> phosphorylase, glycogen, liver                                        |
| <i>ACTN1</i>          | NM_001102                    | <i>Homo sapiens</i> actinin, alpha 1                                                      |
| <i>VGLL3</i>          | NM_016206                    | <i>Homo sapiens</i> vestigial like 3 ( <i>Drosophila</i> )                                |
