# Supplementary material for: Comparison of the Transcriptional Profiles of Melanocytes from Dark and Light Skinned Individuals under Basal Conditions and Following Ultraviolet-B Irradiation
Source: PubMed Central journal article supplement (PMC4526690; doi:10.1371/journal.pone.0134911), 2015-08-05
Supplement: pone.0134911.s004.pdf [file pone.0134911.s004.pdf]

**S4 Table.** Top 50 upregulated genes in DM vs LM 24 hours after UVB (non- coding RNAs are indicated with \*) (bonferroni-adjusted p-value <0.0001).

| Locus name         | Accession number | Description                                                                                    |
|--------------------|------------------|------------------------------------------------------------------------------------------------|
| <i>EPT1</i>        | NM_033505        | <i>Homo sapiens</i> ethanolaminephosphotransferase 1 (CDP-ethanolamine-specific)               |
| <i>NFYC</i>        | NM_014223        | <i>Homo sapiens</i> nuclear transcription factor Y, gamma                                      |
| <i>OCIAD1</i>      | NM_001079839     | <i>Homo sapiens</i> OCIA domain containing 1                                                   |
| <i>L3MBTL1</i>     | NM_032107        | <i>Homo sapiens</i> l (3)mbt-like 1 (Drosophila)                                               |
| <i>EPB41L4A</i>    | NM_022140        | <i>Homo sapiens</i> erythrocyte membrane protein band 4.1 like 4A                              |
| <i>PTPN1</i>       | NM_002827        | <i>Homo sapiens</i> protein tyrosine phosphatase, non-receptor type 1                          |
| <i>ZAK</i>         | NM_133646        | <i>Homo sapiens</i> sterile alpha motif and leucine zipper containing kinase AZK               |
| <i>PRADC1</i>      | NM_032319        | <i>Homo sapiens</i> protease-associated domain containing 1                                    |
| <i>UTP6</i>        | NM_018428        | <i>Homo sapiens</i> UTP6, small subunit (SSU) processome component, homolog (yeast)            |
| <i>NAA20</i>       | NM_016100        | <i>Homo sapiens</i> N (alpha)-acetyltransferase 20, NatB catalytic subunit                     |
| <i>AEBP2</i>       | NM_153207        | <i>Homo sapiens</i> AE binding protein 2                                                       |
| <i>PLS1</i>        | NM_002670        | <i>Homo sapiens</i> plastin 1                                                                  |
| <i>SH3KBP1</i>     | NM_001024666     | <i>Homo sapiens</i> SH3-domain kinase binding protein 1                                        |
| <i>CUL4A</i>       | NM_001008895     | <i>Homo sapiens</i> cullin 4A                                                                  |
| <i>C19orf2</i>     | NM_003796        | <i>Homo sapiens</i> chromosome 19 open reading frame 2                                         |
| <i>FDXACB1</i>     | NM_138378        | <i>Homo sapiens</i> ferredoxin-fold anticodon binding domain containing 1                      |
| <i>TRDMT1</i>      | NM_004412        | <i>Homo sapiens</i> tRNA aspartic acid methyltransferase 1                                     |
| <i>ESAM</i>        | NM_138961        | <i>Homo sapiens</i> endothelial cell adhesion molecule                                         |
| <i>ARSK</i>        | NM_198150        | <i>Homo sapiens</i> arylsulfatase family, member K                                             |
| <i>CYP4A11</i>     | NM_000778        | <i>Homo sapiens</i> cytochrome P450, family 4, subfamily A, polypeptide 11                     |
| <i>MED23</i>       | NM_015979        | <i>Homo sapiens</i> mediator complex subunit 23                                                |
| <i>KIF1A</i>       | NM_004321        | <i>Homo sapiens</i> kinesin family member 1A                                                   |
| <i>SLC28A1</i>     | NM_004213        | <i>Homo sapiens</i> solute carrier family 28 (sodium-coupled nucleoside transporter), member 1 |
| <i>PHF10</i>       | NM_018288        | <i>Homo sapiens</i> PHD finger protein 10                                                      |
| <i>PEX26</i>       | NM_001199319     | <i>Homo sapiens</i> peroxisomal biogenesis factor 26                                           |
| <i>PPY</i>         | NM_002722        | <i>Homo sapiens</i> pancreatic polypeptide                                                     |
| <i>FAM189A2</i>    | NM_004816        | <i>Homo sapiens</i> family with sequence similarity 189, member A2                             |
| <i>ATP2A3</i>      | NM_174953        | <i>Homo sapiens</i> ATPase, Ca <sup>++</sup> transporting, ubiquitous                          |
| <i>HLA-DPB1</i>    | NM_002121        | <i>Homo sapiens</i> major histocompatibility complex, class II, DP beta 1                      |
| <i>ABT1</i>        | NM_013375        | <i>Homo sapiens</i> activator of basal transcription 1                                         |
| <i>PTK7</i>        | NM_002821        | <i>Homo sapiens</i> PTK7 protein tyrosine kinase 7                                             |
| * <i>LOC642781</i> | XR_112733        | PREDICTED: <i>Homo sapiens</i> hypothetical LOC642781                                          |
| <i>RAP2A</i>       | NM_021033        | <i>Homo sapiens</i> RAP2A, member of RAS oncogene family                                       |
| <i>ANKRD13C</i>    | NM_030816        | <i>Homo sapiens</i> ankyrin repeat domain 13C                                                  |
| <i>PPP6C</i>       | NM_002721        | <i>Homo sapiens</i> protein phosphatase 6, catalytic subunit                                   |
| <i>FTSJ3</i>       | NM_017647        | <i>Homo sapiens</i> FtsJ homolog 3 (E.coli)                                                    |
| <i>RNF113A</i>     | NM_006978        | <i>Homo sapiens</i> ring finger protein 113A                                                   |
| <i>RTN3</i>        | NM_006054        | <i>Homo sapiens</i> reticulon 3                                                                |
| <i>MAPKAP1</i>     | NM_001006618     | <i>Homo sapiens</i> mitogen-activated protein kinase associated protein 1                      |
| <i>LOC643669</i>   | XM_933621        | PREDICTED: <i>Homo sapiens</i> hypothetical protein LOC643669, transcript variant 1            |
| <i>CLSTN3</i>      | NM_014718        | <i>Homo sapiens</i> calyntenin 3                                                               |
| <i>THBS2</i>       | NM_003247        | <i>Homo sapiens</i> thrombospondin 2                                                           |
| * <i>LOC254559</i> | NR_015411        | <i>Homo sapiens</i> hypothetical LOC254559                                                     |
| <i>PPF1BP1</i>     | NM_177444        | <i>Homo sapiens</i> PTPRF interacting protein, binding protein 1 (liprin beta 1)               |
| * <i>ZNF284</i>    | CR936662         | <i>Homo sapiens</i> mRNA; cDNA DKFZp781F1775                                                   |
| <i>SIRT6</i>       | NM_016539        | <i>Homo sapiens</i> sirtuin 6                                                                  |
| <i>RABGAP1</i>     | NM_012197        | RAB GTPase activating protein 1                                                                |
| <i>C10orf58</i>    | NM_032333        | <i>Homo sapiens</i> chromosome 10 open reading frame 58                                        |
| <i>FCRLB</i>       | NM_001002901     | <i>Homo sapiens</i> Fc receptor-like B                                                         |
